# Supplementary material
Source: PubMed Central journal article supplement (PMC5884744)
Supplement: NIHMS949954-supplement-Supp.pdf [file NIHMS949954-supplement-Supp.pdf]

**Supporting Information**

**For**

**The ferroxidase hephaestin but not amyloid precursor protein is required for ferroportin supported iron efflux in primary hippocampal neurons**

Changyi Ji, Brittany L. Steimle, Danielle K. Bailey, Daniel J. Kosman\*

Department of Biochemistry, State University of New York, School of Medicine and Biomedical Sciences  
Buffalo, NY 14214, USA.

\*To whom correspondence should be addressed: Daniel J Kosman, Department of Biochemistry,  
University at Buffalo, Farber Hall Room 140, 3435 Main St., Building 26, Buffalo, NY 14214-3000, USA.;  
(716) 829-2842; Fax: (716) 829-2661; e-mail: [camkos@buffalo.edu](mailto:camkos@buffalo.edu)

(a) Primary hippocampal neurons

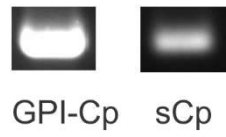

(b)

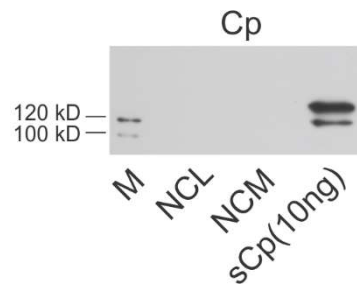

**Fig.s1** Ceruloplasmin (Cp) is not detected at the protein level in rat primary hippocampal neuronal cultures (a) RT-PCR demonstration of GPI-Cp (440bp) and sCp (196bp) transcripts in neuronal the mRNA pool. (b) Probing for Cp by western blot in rat primary hippocampal neuronal lysates and conditioned media. No detectable GPI-linked or secreted Cp was observed. Human sCp (10ng) was used as a positive control.

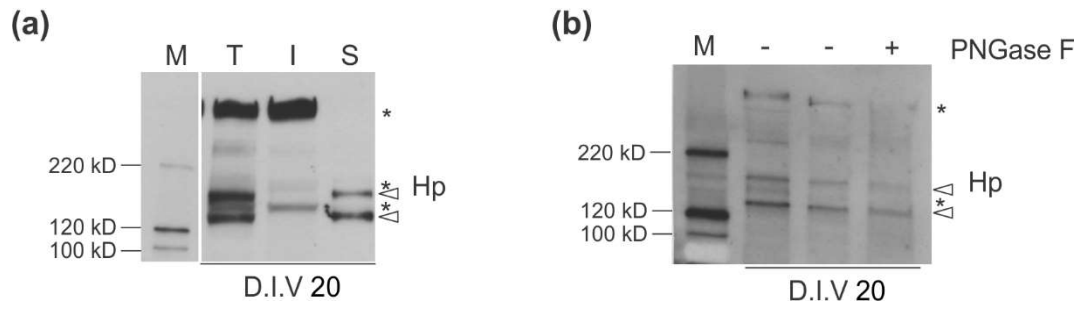

**Fig.s2** Validation of Hsp antibody (a) 100 µg total (T) or intracellular (I) protein, or surface (S) protein from 100 µg a total protein sample were loaded in each lane. (b) PNGase F catalyzed N-deglycosylation in rat primary hippocampal neurons. Total cellular protein (20 µg) was incubated with PNGase F at 37 °C for 16 h. Arrow heads indicate Hsp of the expected molecular mass. Stars indicate oligomer or post-translationally modified forms of the protein, respectively.

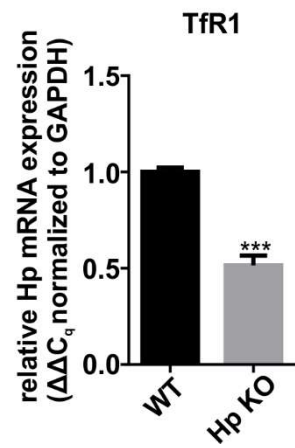

**Fig.s3** Quantitative RT-PCR for transferrin receptor 1 (TfR1) mRNA isolated from wild type or *HEPH* knockout mouse neurons. Statistical significance was tested by unpaired t test. \*\*\*,  $p < 0.001$ .
